# Supplementary material
Source: publisher figshare collection journal article supplement (https://tandf.figshare.com/articles/dataset/_/5624821)
Supplement: Supplementary file 1 [file 1]

Archive with 4 entries (4 files):
- Legend to Suppl figure 1.pdf
- Suppl_Figure 1.pdf
- Suppl_Table 1.pdf
- Suppl_Table 2.pdf
