# Supplementary material
Source: publisher figshare collection journal article supplement (https://tandf.figshare.com/articles/dataset/_/5624821)
Supplement: Supplementary file 1 [file 1 › Legend to Suppl figure 1.pdf]

Legend to Supplementary Figure 1. *Estrogen and HER2 Receptor Status by IHC and Expression Profile.*

A. A Venn diagram illustrating the common set of ER-positive tissue-specimens (blue interface), both at the cut-off level set for today's clinical practice ( $>1\%$ ) and the originally cut-off level ( $>9\%$ ), (ER-positive by IHC; light blue and by mRNA; green). As illustrated, the overlaps of the expression-array based ER-positive samples and the IHC-determined ER-positive samples, are 91% (420/461) and 93% (420/453), respectively. B. A diagram depicting the correlation between the expression array HER2-profile and IHC score, clearly showing conformity between the HER2-negative samples. 76% (42/55) was assigned as HER2-positive by expression profile of the IHC-determined HER2-positive samples (3+). 7 samples showed intermediate expression of HER2: one with 1+, four with 2+ and two with 3+ IHC HER2 score. C. A box-plot of the HER2 status, where positive includes both the IHC 3+ and HER2-amplified by FISH, depicted according to HER2 expression index by array (y-axes); EXP- (HER2-negative assigned by expression array data); EXP+ (HER2-positive assigned by expression array data).
