# Supplementary material
Source: publisher figshare collection journal article supplement (https://tandf.figshare.com/articles/dataset/_/5624821)
Supplement: Supplementary file 1 [file 1 › Suppl_Table 1.pdf]

Supplementary Table 1. Hormone receptor status defined by IHC, FISH and expression data.

Samples: n = 520. \* corresponds to seven samples that were assigned with intermediate HER2 expression level. ER data is based on a cut-off >1%

|                    |       | IHC | mRNA | FISH      |               |
|--------------------|-------|-----|------|-----------|---------------|
|                    |       |     |      | amplified | not amplified |
| ER-                |       | 59  | 97   | -         | -             |
| ER+                |       | 461 | 423  | -         | -             |
| PGR-               |       | ND  | 172  | -         | -             |
| PGR+               |       | ND  | 348  | -         | -             |
| HER2-              | 0, 1+ | 327 | 471  | -         | -             |
| HER2<br>borderline | 2+    | 138 | 7*   | 16        | 122           |
| HER2+              | 3+    | 55  | 42   | -         | -             |
