# Supplementary material
Source: publisher figshare collection journal article supplement (https://tandf.figshare.com/articles/dataset/_/5624821)
Supplement: Supplementary file 1 [file 1 › Suppl_Table 2.pdf]

Supplementary Table 2. Pathogenic germline mutations identified in *BRCA1/BRCA2*.

| Sample ID | Subtype              | Age BC onset | Gene         | Nucleotide         | Protein           |
|-----------|----------------------|--------------|--------------|--------------------|-------------------|
| 1         | BasL                 | 30           | <i>BRCA1</i> | c.4186-?_4675+?del | p.Gln1396Argfs*42 |
| 89        | BasL                 | 33           | <i>BRCA1</i> | c.5251C>T          | p.Arg1751*        |
| 115       | BasL                 | 31           | <i>BRCA1</i> | c.2475delC         | p.Asp825Glufs*21  |
| 163       | BasL                 | 33           | <i>BRCA1</i> | c.1823_1826delAGAA | p.Lys608Ilefs*3   |
| 273       | BasL                 | 54           | <i>BRCA2</i> | c.4633delC         | p.Leu1545Phefs*23 |
| 408       | BasL                 | 52           | <i>BRCA2</i> | c.7878G>C          | p.Trp2626Cys      |
| 517       | BasL                 | 32           | <i>BRCA1</i> | c.81-?_4986+?del   | p.Cys27*          |
| 211       | Mixed<br>(mApo/LumC) | 72           | <i>BRCA1</i> | c.3607C>T          | p.Arg1203*        |
