# Supplementary material
Source: publisher figshare collection journal article supplement (https://tandf.figshare.com/articles/dataset/_/5624821)

A.

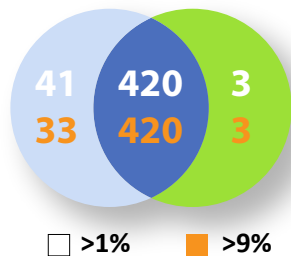

B.

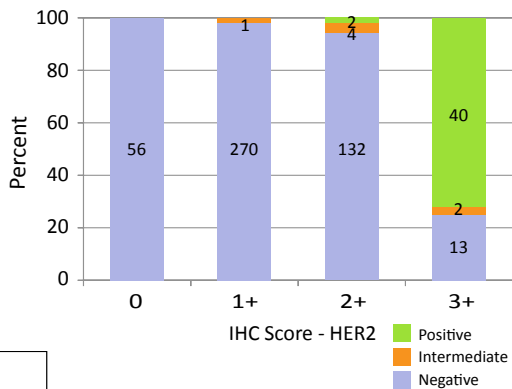

C.

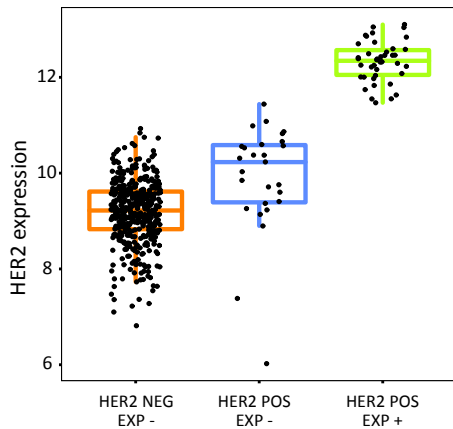

Supplement: Supplementary file 1 [file 1 › Suppl_Figure 1.pdf]
